# Supplementary material
Source: Springer Nature journal article supplement (https://www.springermedizin.de/resource/supplementary/12884_2013_801_MOESM3_ESM.pdf/9458230)
Supplement: MOESM3 [file 9458230]

Assessed for eligibility (n=909):  
Singleton pregnancy 15+<sup>0</sup> to 17+<sup>6</sup> weeks gestation and BMI  $\geq$  30kg/m<sup>2</sup>  
Women with certain pre-existing conditions excluded

Excluded (n=726):  
Did not meet inclusion criteria (n=243)  
Declined to participate (n=473)  
Miscarriage/TOP after consent (n=10)

Randomised (n=183)

Allocated to control arm (n=89)

Allocated to intervention arm (n=94)

Lost to follow-up:  
Women: n=14  
Neonates: n=5

Lost to follow-up:  
Women: n=15  
Neonates: n= 9  
Discontinued intervention: 4  
Preterm delivery: 0  
Withdrew: 4

Analysed (primary endpoint):  
Women: n=75  
Neonates: n=84  
Excluded from analysis: 0

Analysed:  
Women: n=79  
Neonates: n= 85  
Excluded from analysis:0
